# Supplementary material for: Electrolyte Solvation Structure Manipulation and Synthetic Optimization for Enhanced Potassium Storage of Tin Phosphide/Carbon Alloy-Based Electrode
Source: MDPI journal article supplement (doi:10.3390/met13040658), 2023-03-26
Supplement: s1 [file s1]

Archive with 1 entries (1 files):
- metals-2240652-supplementary.pdf
