# Supplementary material for: Electrolyte Solvation Structure Manipulation and Synthetic Optimization for Enhanced Potassium Storage of Tin Phosphide/Carbon Alloy-Based Electrode
Source: MDPI journal article supplement (doi:10.3390/met13040658), 2023-03-26
Supplement: s1 [file s1 › metals-2240652-supplementary.pdf]

## Article

# Electrolyte Solvation Structure Manipulation and Synthetic Optimization for Enhanced Potassium Storage of Tin Phosphide/Carbon Alloy-Based Electrode

Zhen Feng <sup>1,†</sup>, Ruoxuan Chen <sup>2,†</sup>, Rui Huang <sup>2</sup>, Fangli Zhang <sup>3</sup>, Weizhen Liu <sup>1</sup> and Sailin Liu <sup>3,\*</sup>

<sup>1</sup> Guangdong Provincial Key Laboratory of Solid Wastes Pollution Control and Recycling, School of Environment and Energy, South China University of Technology, Guangzhou 510006, China

<sup>2</sup> School of Metallurgy and Environment, Central South University, Changsha 410083, China

<sup>3</sup> School of Chemical Engineering and Advanced Materials, Faculty of Sciences, Engineering and Technology, The University of Adelaide, Adelaide 5005, Australia

\* Correspondence: sailin.liu@adelaide.edu.au

† These authors contributed equally to this work.

**Table S1.** Parameters of ball milling. The bold number is reference value. That means a time of 10 h, a speed of 500 rpm, a ratio of 30: 1, and a ball size of 10 mm. When one parameter is used as a variable, the value of other parameters is fixed as the reference value.

| Parameter              | Values    |             |           |
|------------------------|-----------|-------------|-----------|
| Time(h)                | <b>10</b> | 20          | <b>30</b> |
| Speed(rpm)             | 400       | <b>500</b>  | 600       |
| Ratio(ball: materials) | 15:1      | <b>30:1</b> | 60:1      |
| Ball size(mm)          | 2         | 5           | <b>10</b> |

Table S1 describes nine different ball milling parameters conditions.

1) **2mm**, 30h, 30:1, 500rpm.

2) **5mm**, 30h, 30:1, 500rpm.

3) 10mm, 30h, 30:1, 500rpm.

4) 10mm, **10h**, 30:1, 500rpm.

5) 10mm, **20h**, 30:1, 500rpm.

6) 10mm, 30h, **15:1**, 500rpm.

7) 10mm, 30h, **60:1**, 500rpm.

8) 10mm, 30h, 30:1, **400rpm**.

9) 10mm, 30h, 30:1, **600rpm**.

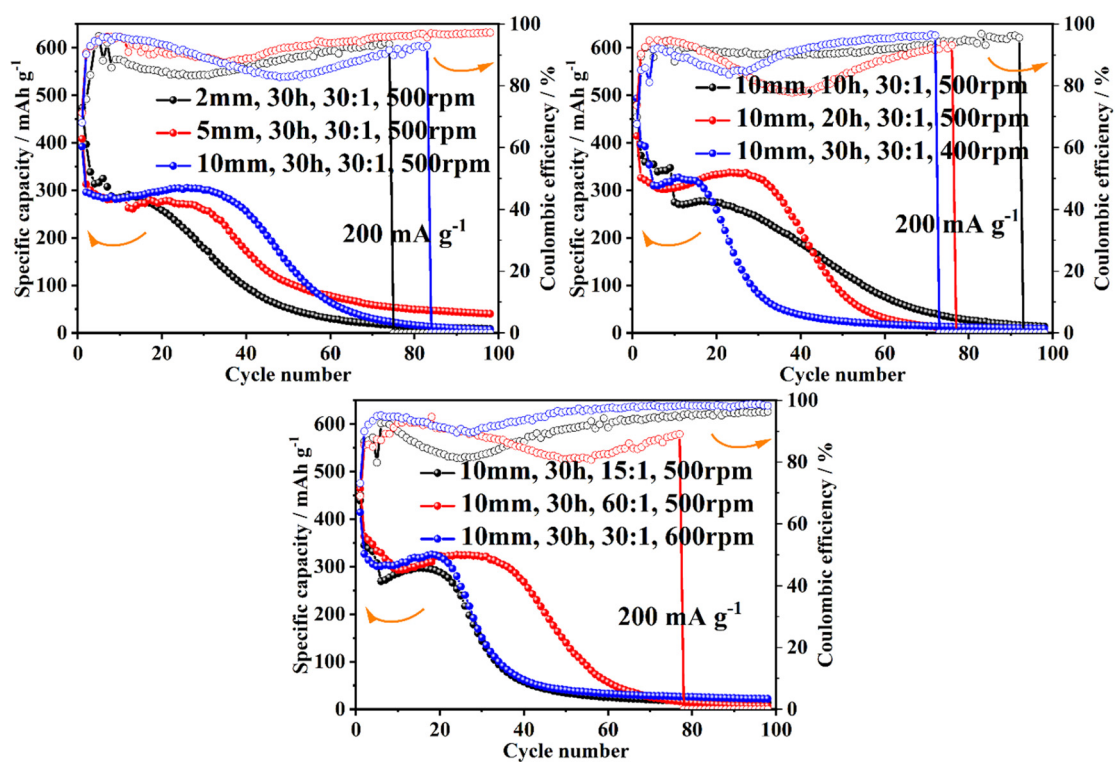

**Figure S1.** Cycling performance of the  $\text{Sn}_4\text{P}_3/\text{C}$  electrodes in PIBs at the current density of  $200 \text{ mA g}^{-1}$ .

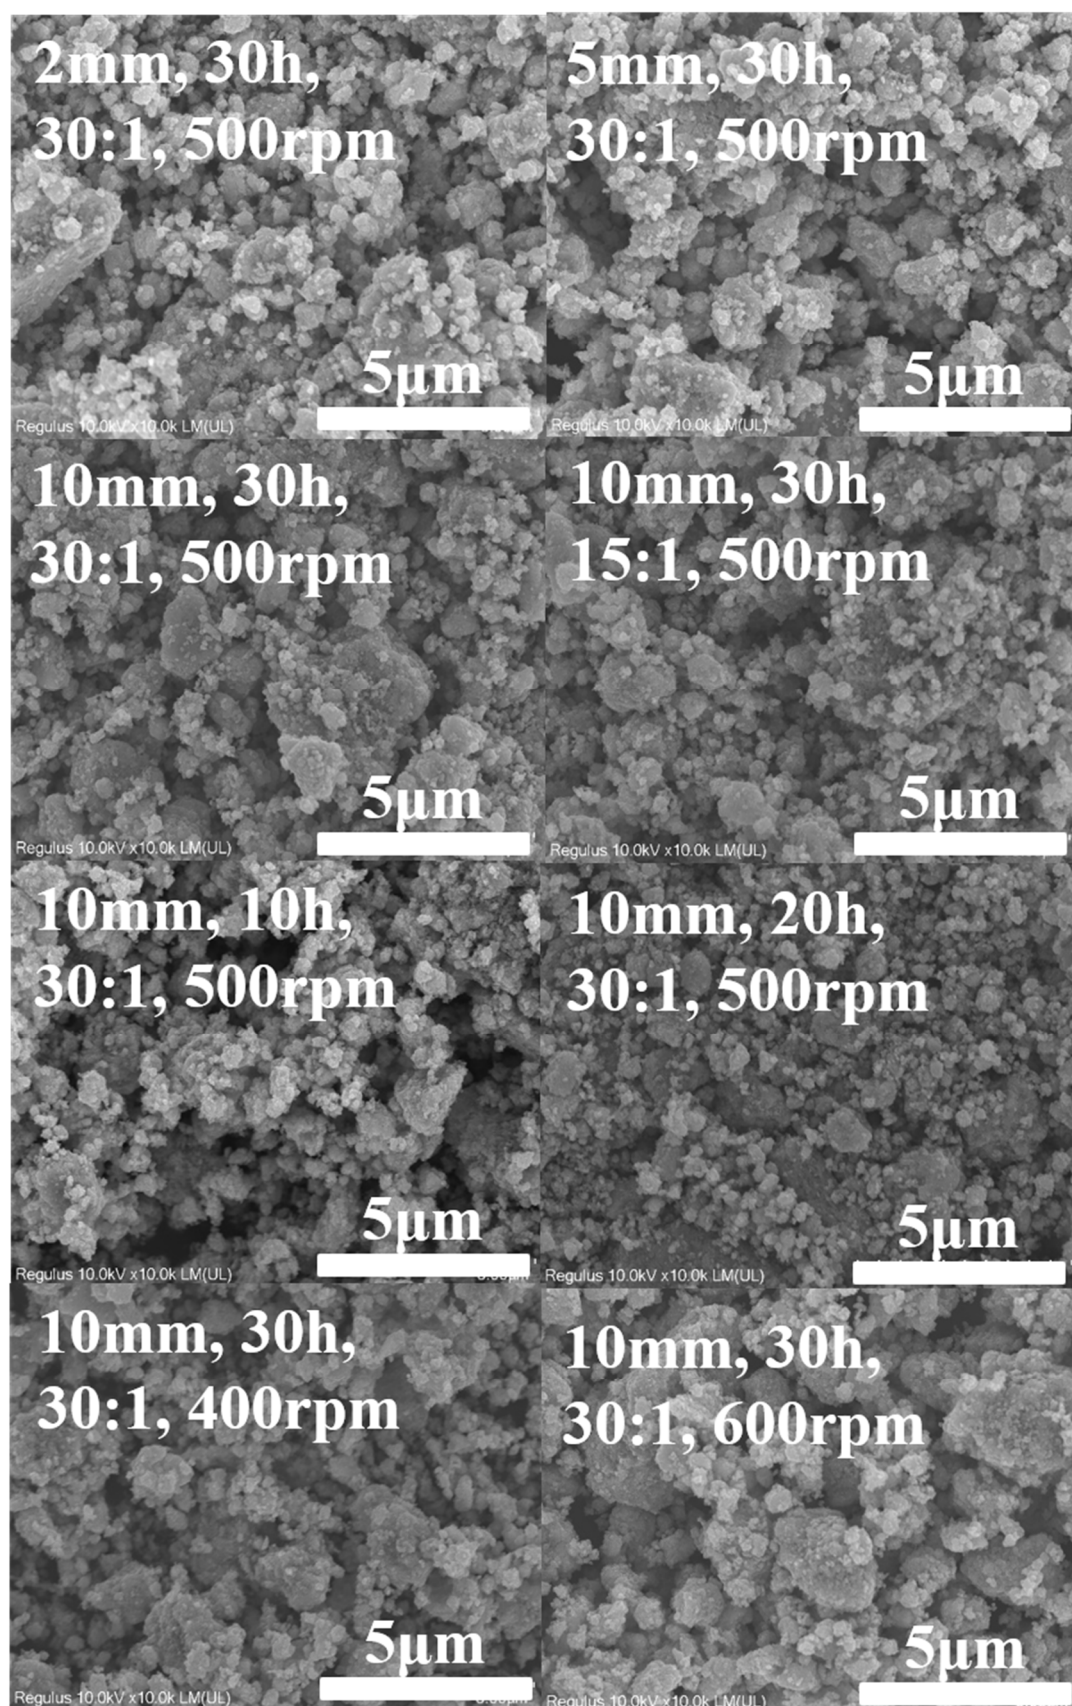

**Figure S2.** SEM images of Sn<sub>4</sub>P<sub>3</sub>/C composites under different ball milling parameters.

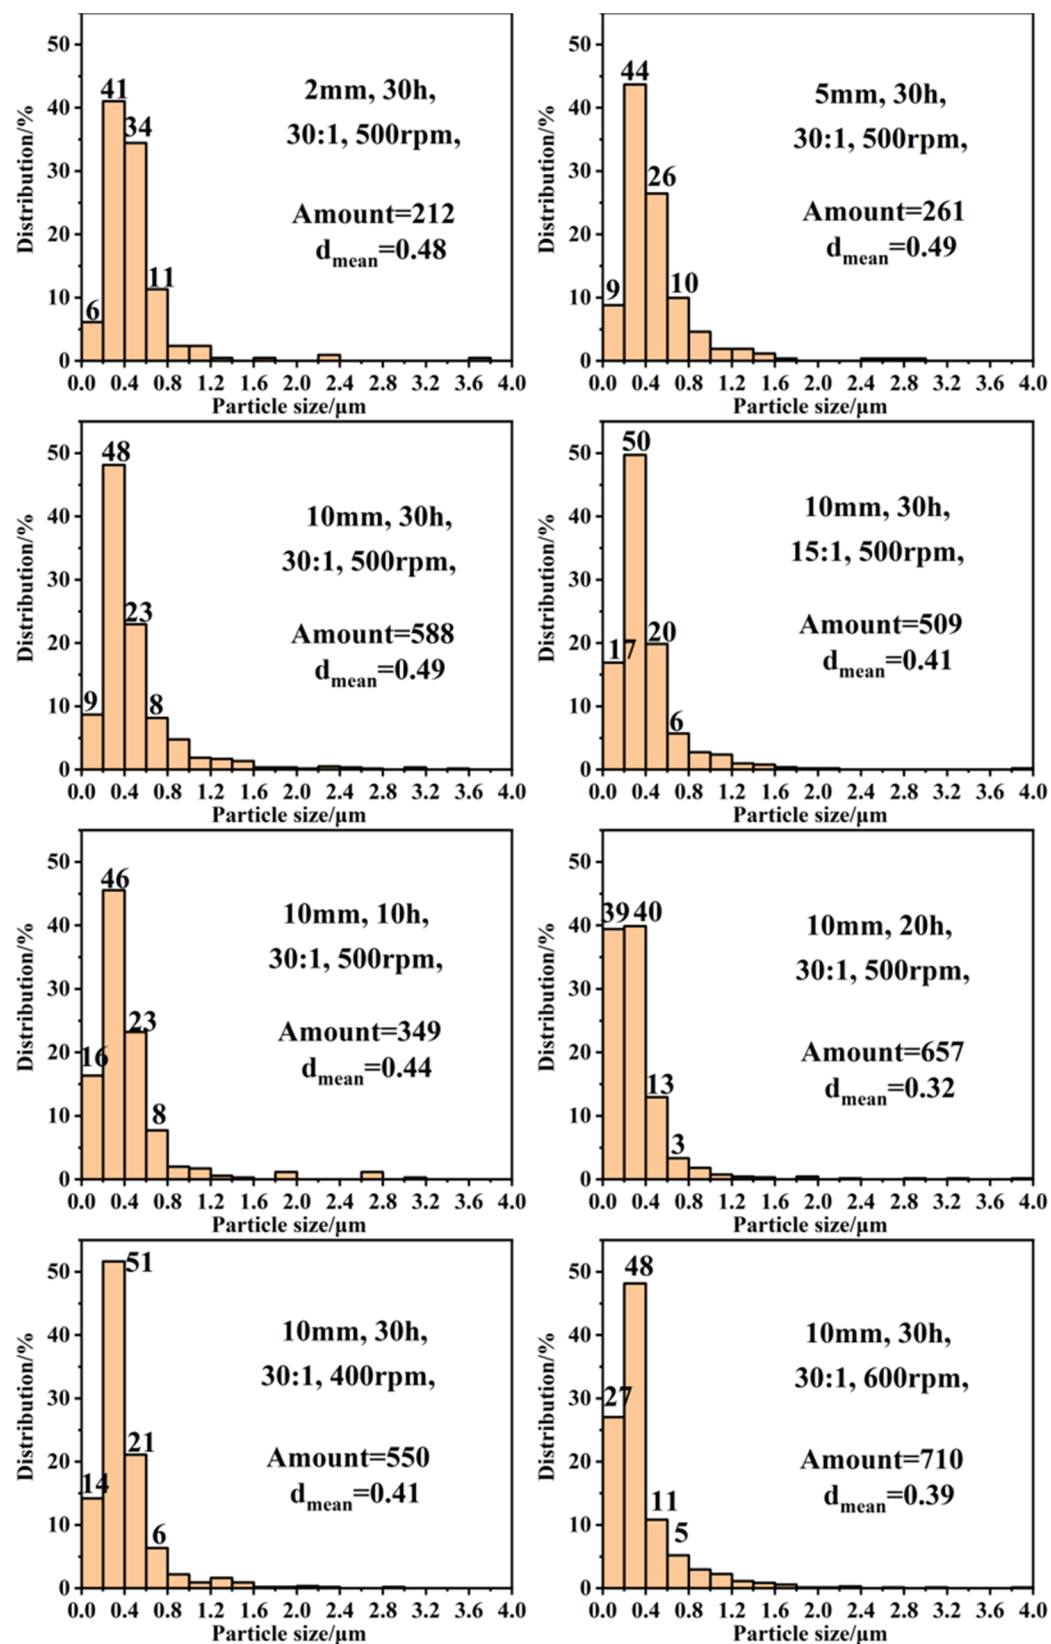

Figure S3. Particle size distribution of  $\text{Sn}_4\text{P}_3/\text{C}$  composites under different ball milling parameters.

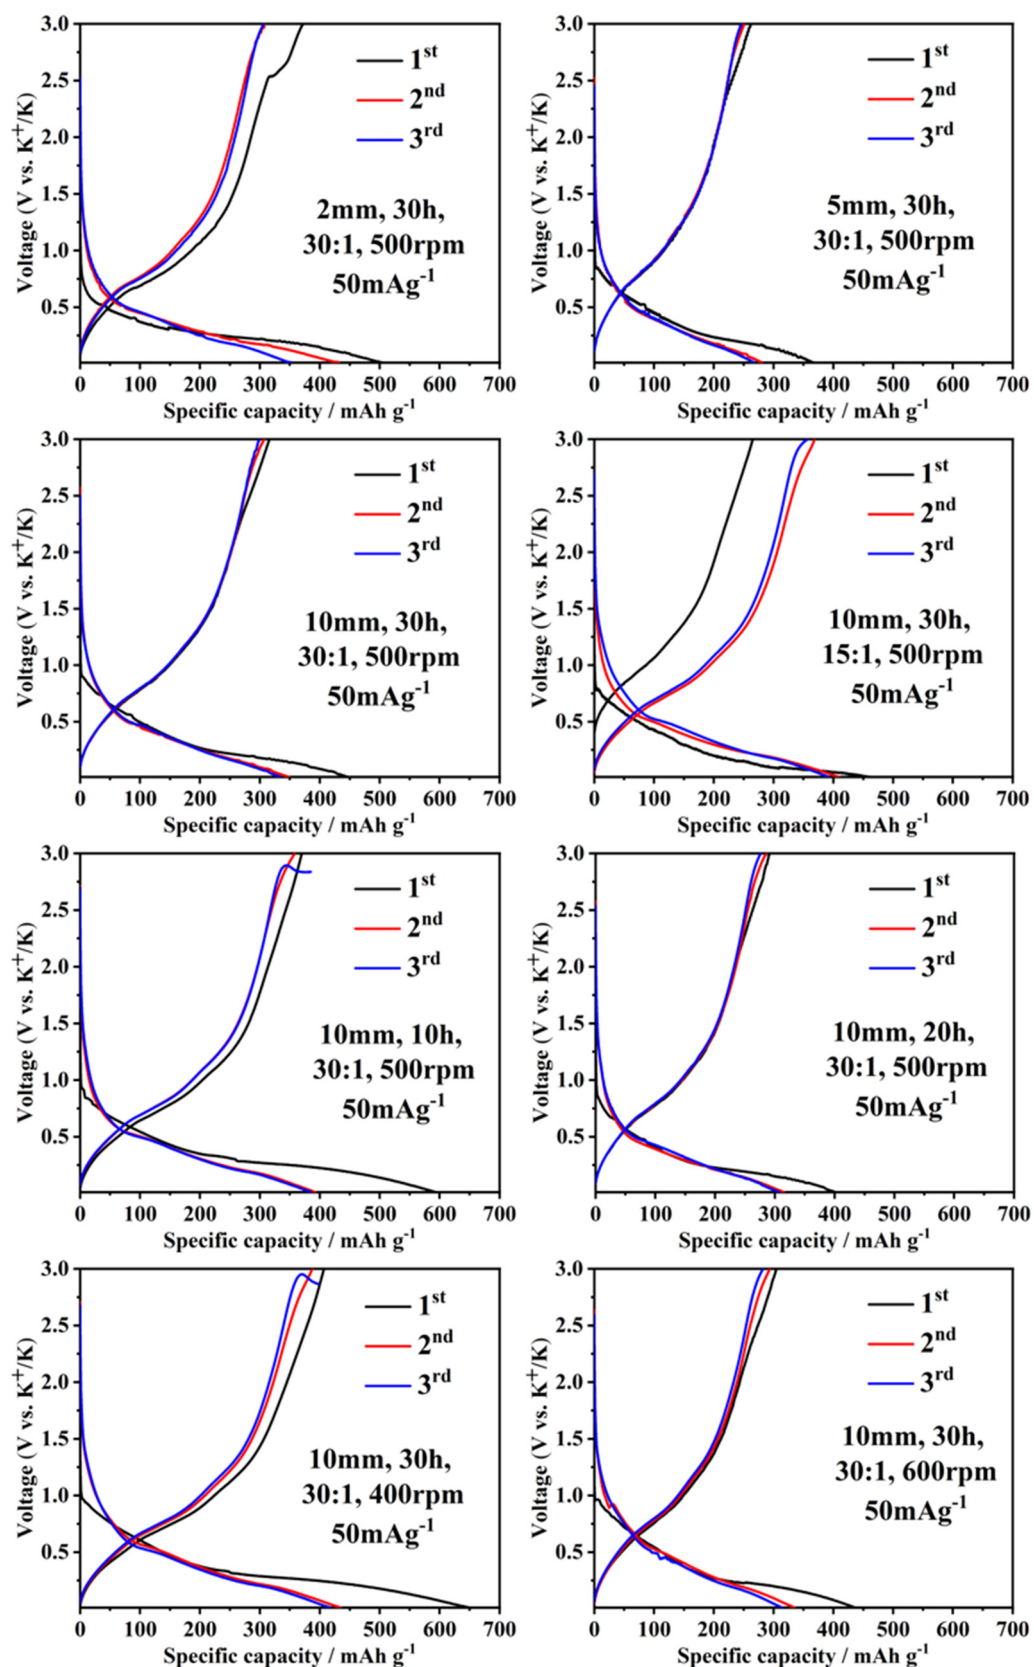

**Figure S4.** The first, second and third discharge/charge profiles of PIBs with  $\text{Sn}_4\text{P}_3/\text{C}$  at the current density of  $50 \text{ mA g}^{-1}$ .

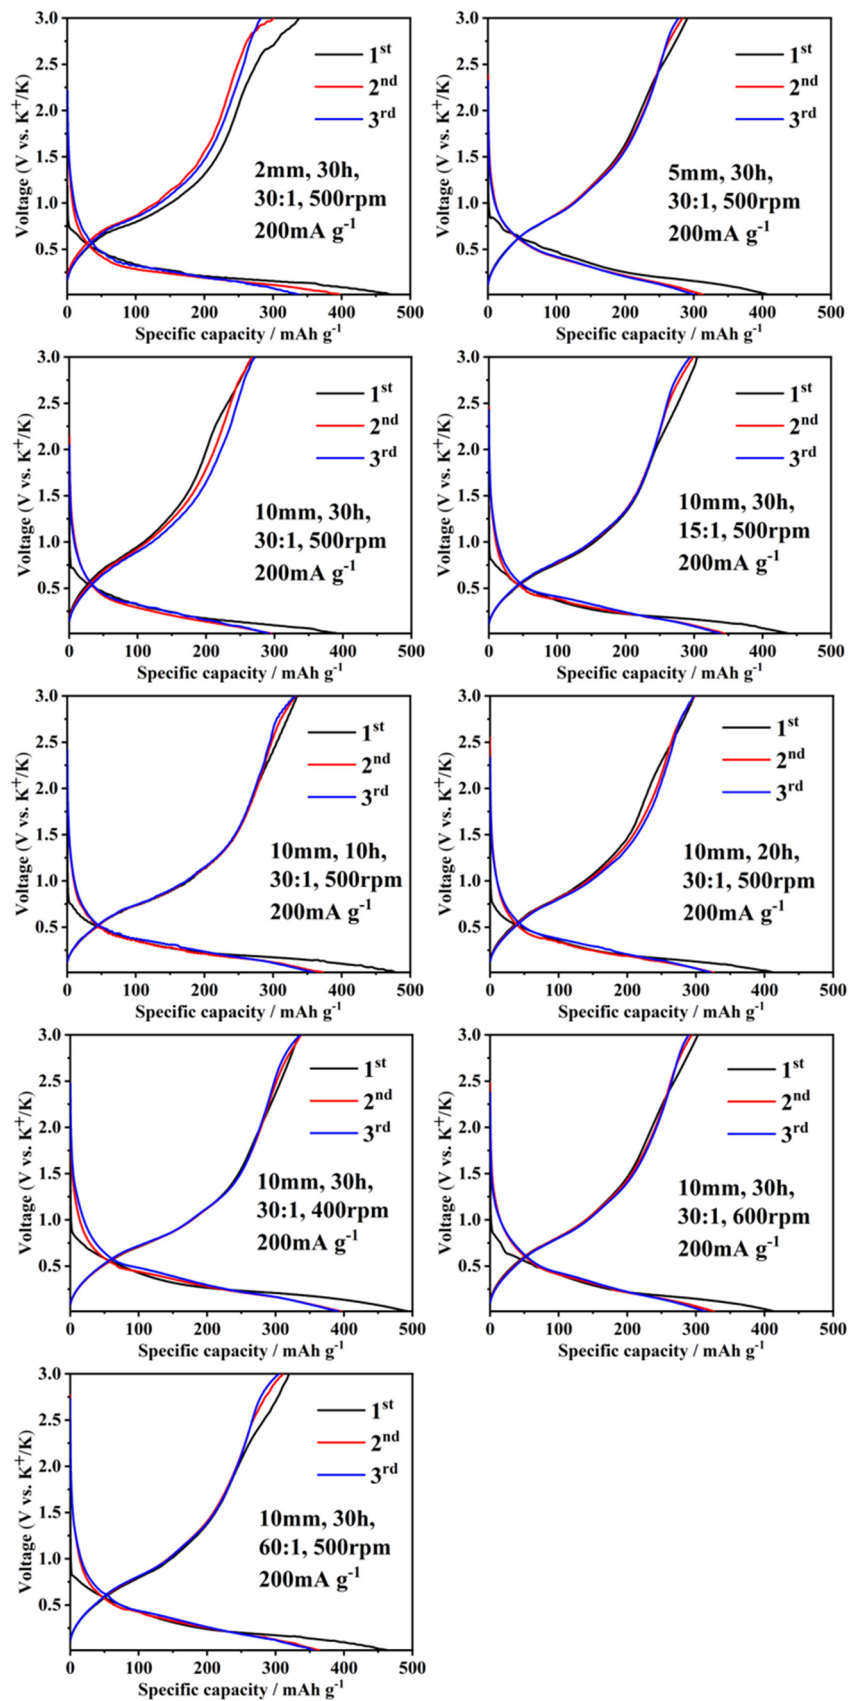

**Figure S5.** The first, second and third discharge/charge profiles of PIBs with  $\text{Sn}_4\text{P}_3/\text{C}$  at the current density of  $200 \text{ mA g}^{-1}$ .

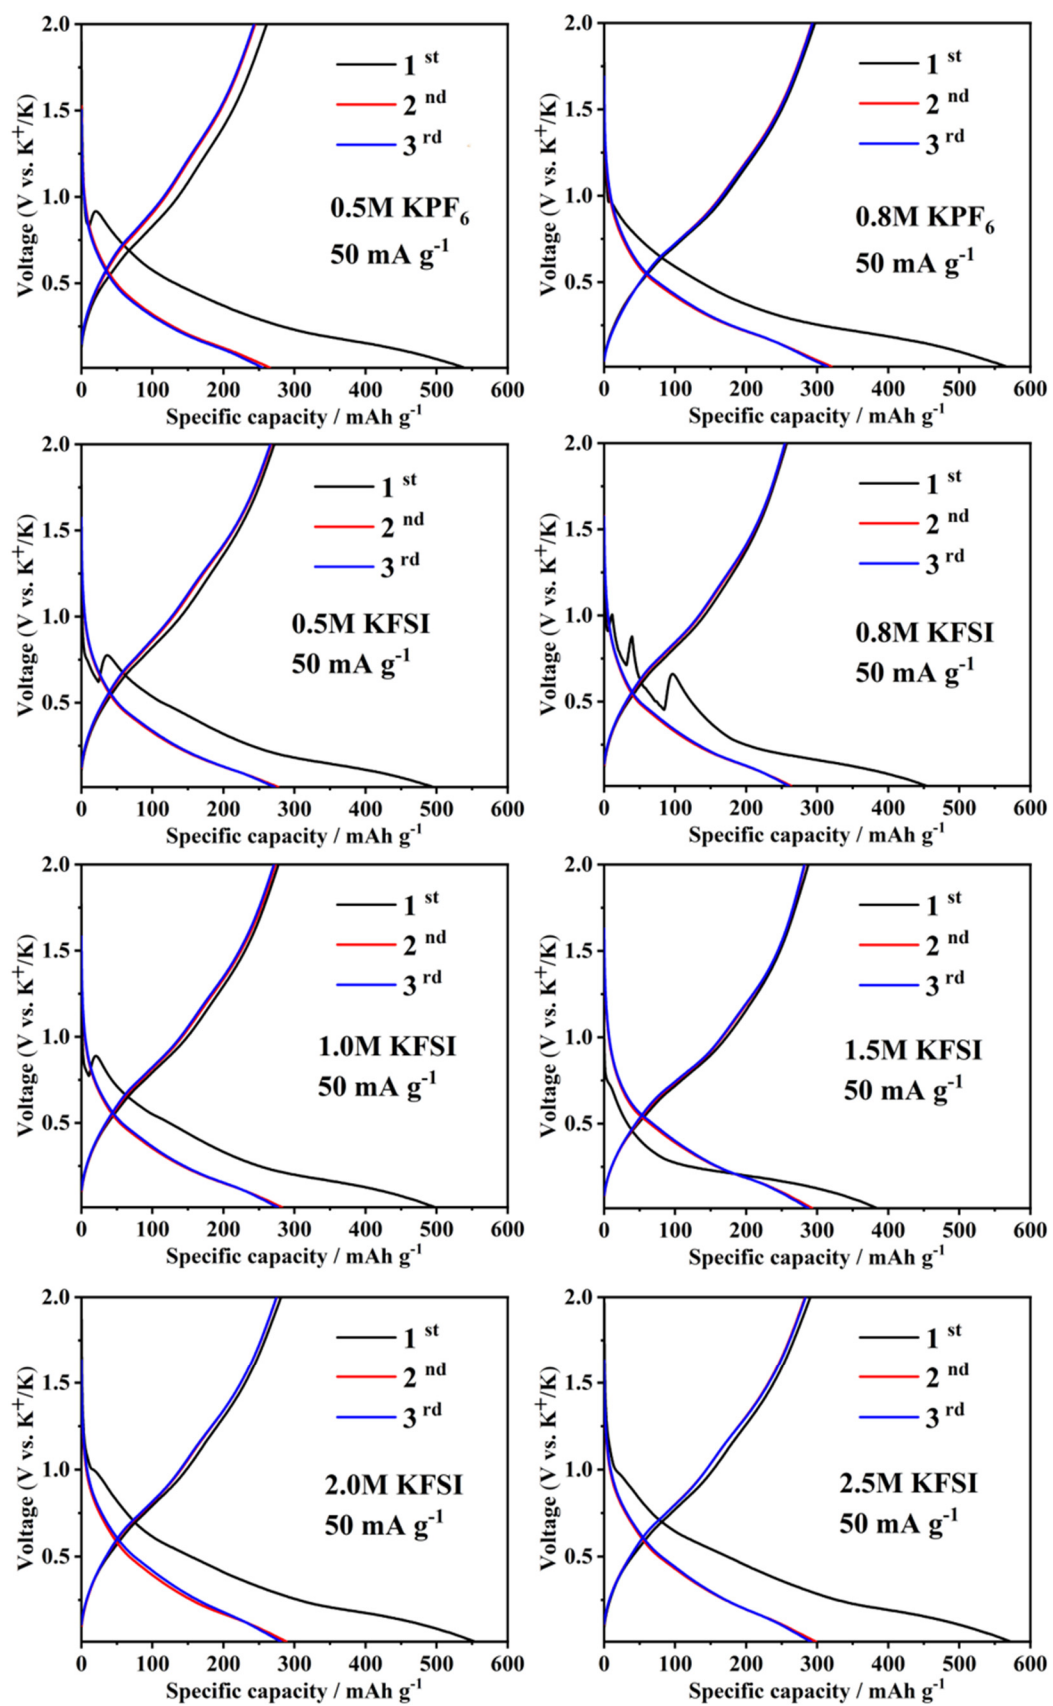

**Figure S6.** The initial, second, and third discharge/charge profiles of  $\text{Sn}_4\text{P}_3/\text{C}$  anode with different electrolyte at  $50\text{ mA g}^{-1}$  current density.

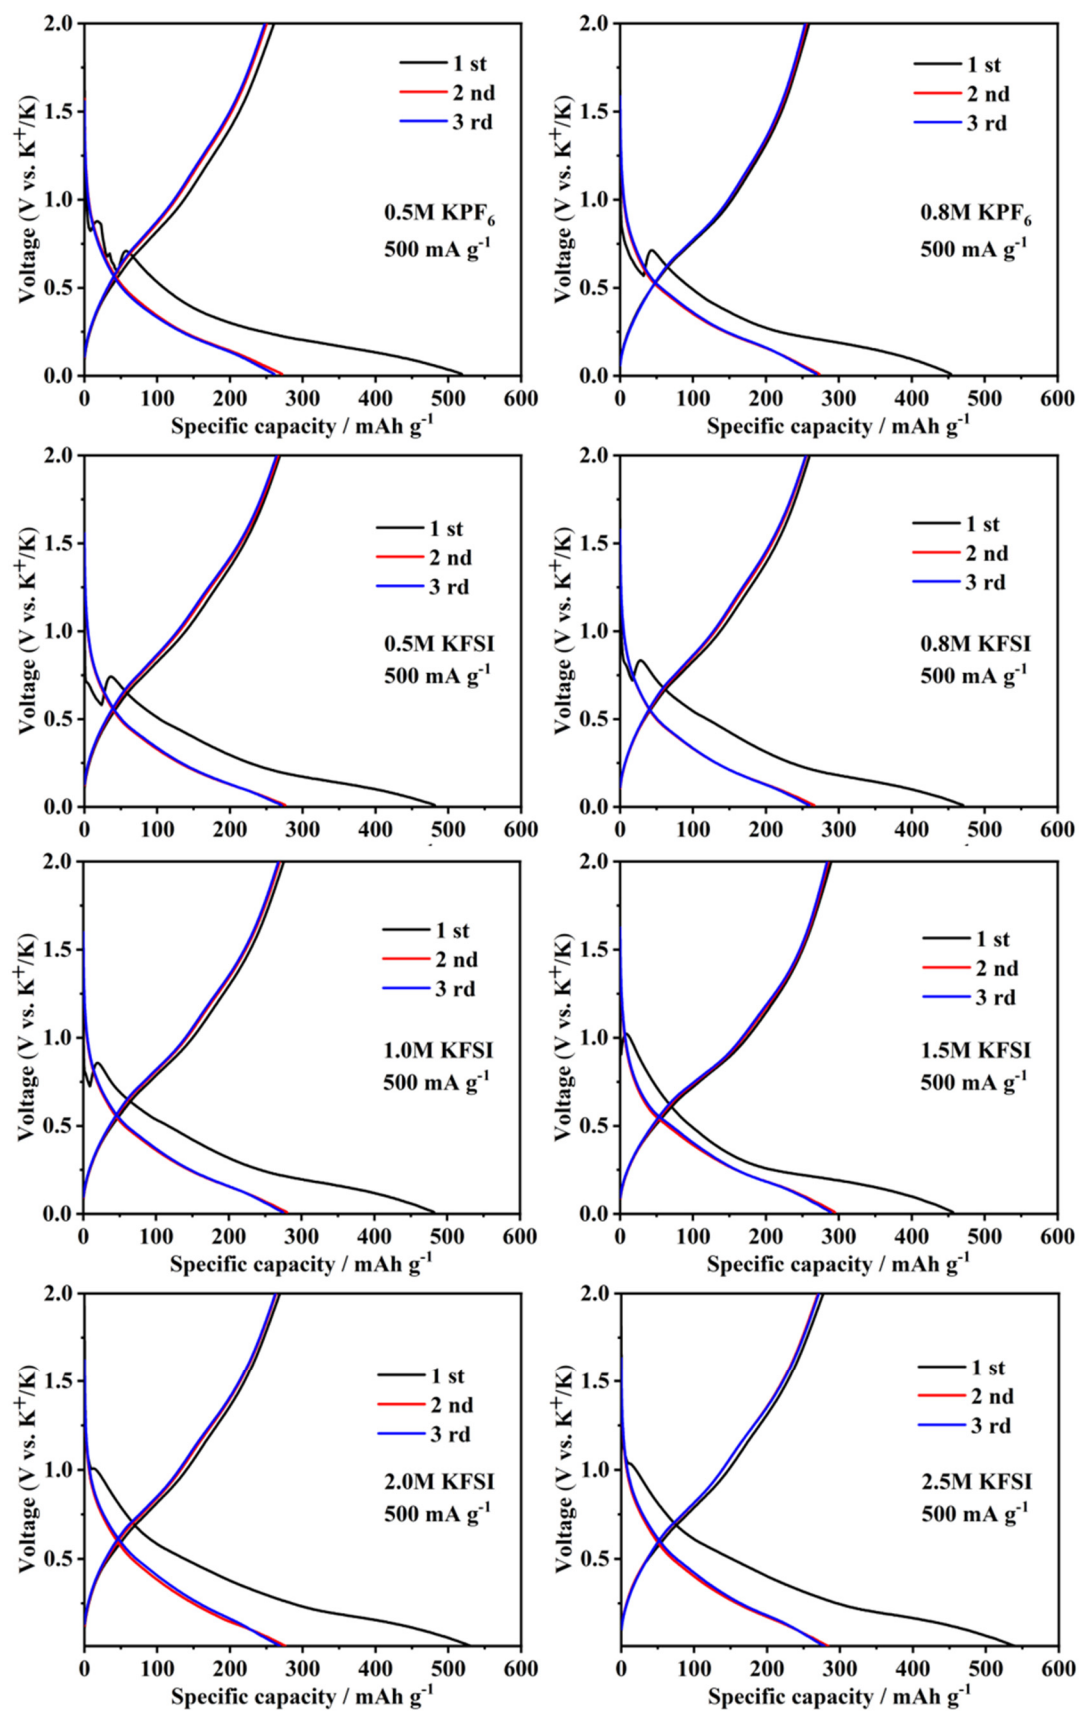

**Figure S7.** The initial, second, and third discharge/charge profiles of  $\text{Sn}_4\text{P}_3/\text{C}$  anode with different electrolyte at  $500 \text{ mA g}^{-1}$  current density.

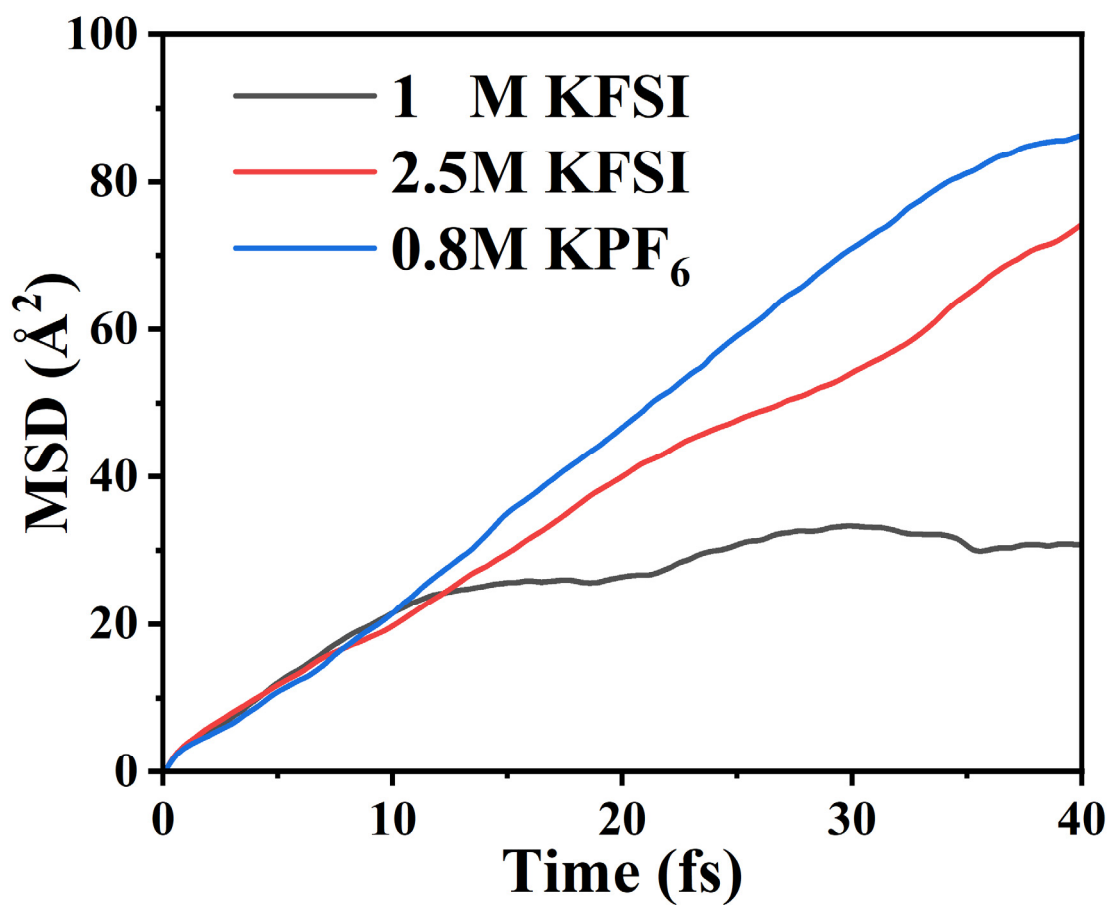

Figure S8. Mean Square Displacement (MSD) of  $K^+$  in different electrolytes.

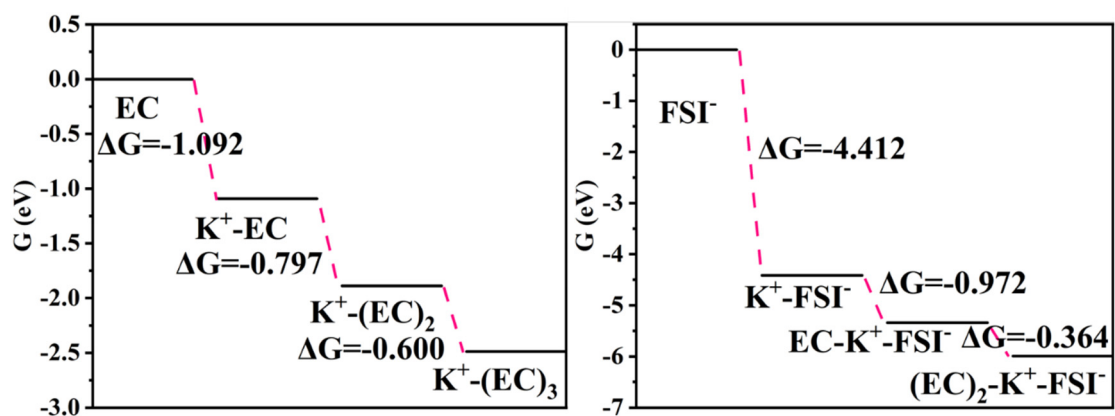

Figure S9. Gibbs free energy of  $K^+-EC$  and  $K^+-FSI$ .
